# Supplementary material for: Circulating tumor cells (CTC) and KRAS mutant circulating free DNA (cfDNA) detection in peripheral blood as biomarkers in patients diagnosed with exocrine pancreatic cancer
Source: PubMed Central journal article supplement (PMC4619983; doi:10.1186/s12885-015-1779-7), 2015-10-24

# Supplementary Figure 1

Mutation assay:

**G12D**

**G12V**

**G12R**

DNA template: G12D G12V G12R WT H<sub>2</sub>O

G12D G12V G12R WT H<sub>2</sub>O

G12D G12V G12R WT H<sub>2</sub>O

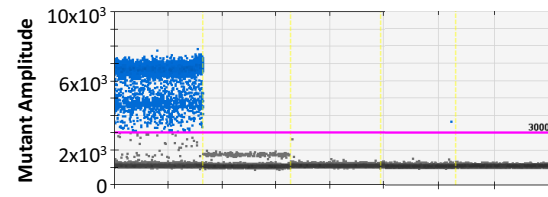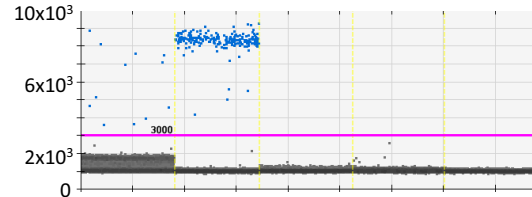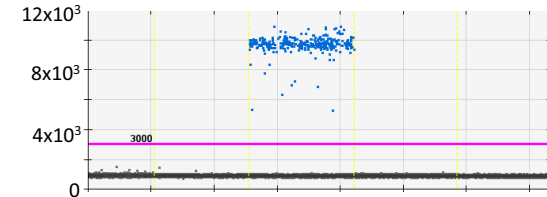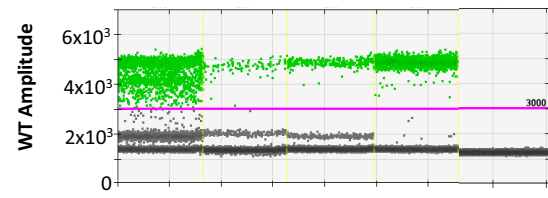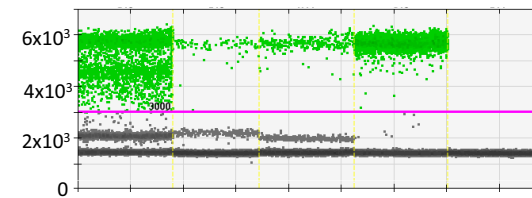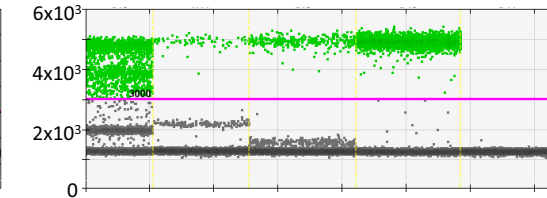

Supplement: 12885_2015_1779_MOESM2_ESM.pdf [file 12885_2015_1779_MOESM2_ESM.pdf]
