# Supplementary material for: Circulating tumor cells (CTC) and KRAS mutant circulating free DNA (cfDNA) detection in peripheral blood as biomarkers in patients diagnosed with exocrine pancreatic cancer
Source: PubMed Central journal article supplement (PMC4619983; doi:10.1186/s12885-015-1779-7), 2015-10-24

Supplementary Figure 3

CTC survival by sex and age

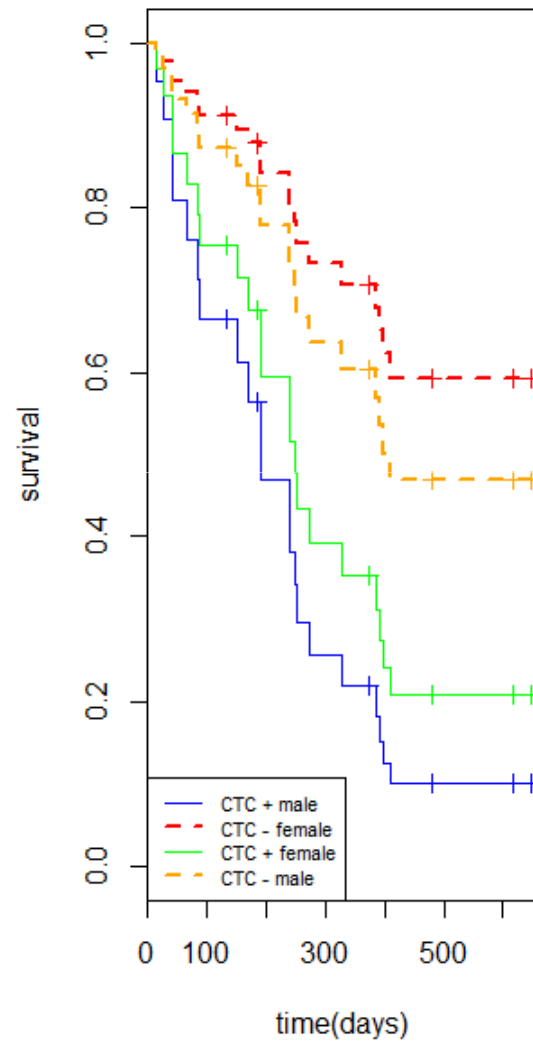

Mutant survival by sex and age

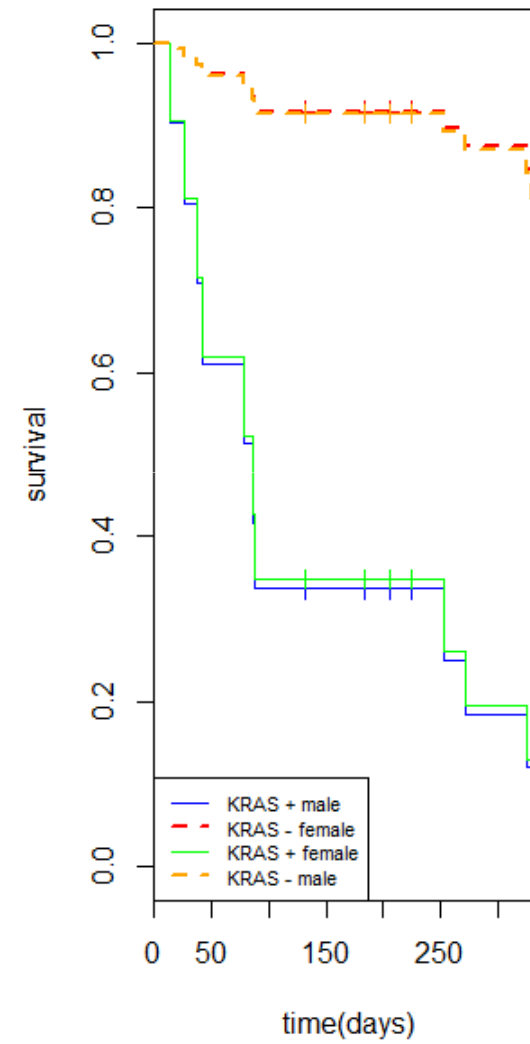

Supplement: 12885_2015_1779_MOESM5_ESM.pdf [file 12885_2015_1779_MOESM5_ESM.pdf]
